# Supplementary material for: Simulating low-frequency wind fluctuations
Source: Copernicus journal article supplement (doi:10.5194/wes-2023-142), 2023-10-24
Supplement: Supplementary file [file wes-2023-142-RC2-supplement.pdf]

## Referee report on “Simulating low-frequency wind fluctuations” by Syed and Mann

The manuscript provides a sampling algorithm for a recently developed inflow turbulence model [A. H. Syed and J. Mann, A model for low-frequency, anisotropic wind fluctuations and coherences in the marine atmosphere. *Boundary-Layer Meteorology*, 190(1), 1 (2024)] that captures the effects of large-scale anisotropies measured in marine atmospheric boundary layers. The model basically consists of a superposition of a two-dimensional Gaussian random velocity field, which accounts for large-scale anisotropy, and the standard Mann wind field model suggested by the International Electrotechnical Commission.

Overall this is a very well-written and valuable contribution to the literature on inflow turbulence models in the context of wind energy. The open-source code of the sampling algorithm of the anisotropic wind field model should lead to important validation of loads in offshore settings. In general, I support the publication of the manuscript in *Wind Energy Science* after the following comments are addressed:

- i.) Eq. (7) provides a method to determine the degree of anisotropy by measuring the components of the spectral tensor of the two-dimensional velocity field. The wind field model itself, however, consists of a superposition of two- and three-dimensional fields. The authors should add a few words on how the ratio in Eq. (7) can be determined from actual measurement data and refer to their original work.
- ii.) The model parameters are listed in line 105. It would be helpful for the reader to list the model parameters determined from the FINO1 and Hywind Scotland measurements in a separate table.
- iii.) I would suggest defining the velocity tensor  $\phi_{ij}(k_1, k_2)$  in terms of the two-dimensional velocity field  $\phi_{ij}(k_1, k_2) = \langle \hat{u}_i(k_1, k_2) \hat{u}_j(-k_1, -k_2) \rangle$ , perhaps even based on the velocity field in real space. Please also check all the indices in Eqs. (11-14): I suppose that summation over index  $j$  is implied in Eq. (11)? Furthermore, there must be an averaging procedure involved from Eq. (12) to Eq. (13) that should be mentioned.
